# Supplementary material for: Landscape of Transcriptional Deregulations in the Preeclamptic Placenta
Source: PLoS One. 2013 Jun 13;8(6):e65498. doi: 10.1371/journal.pone.0065498 (PMC3681798; doi:10.1371/journal.pone.0065498)
Supplement: Table S1 — Complete list of consistently up-regulated genes in the preeclamptic placenta. The lists of up-regulated genes for each of the six preeclamptic placenta microarrays analyzed in this study were confronted using the GENOMATIX list comparison tool (Genomatix Software GmbH, Munich, Germany). This allowed to identify those genes which were consistently up-regulated. Those showing similar modification in at least 4 studies were considered relevant and included in a final list of consistently up-regulated genes. (XLSX) [file pone.0065498.s001.xlsx]

## Sheet: Feuil1
	Table S1. Consistently up-regulated genes in the preeclamptic placenta
	Gene Symbol	Description	EntrezGene ID	Ensembl Gene ID
	APLP2	Amyloid beta (A4) precursor-like protein 2	334	ENSG00000084234
	ARID3A	AT rich interactive domain 3A (BRIGHT-like)	1820	ENSG00000116017
	BAD	BCL2-associated agonist of cell death	572	ENSG00000002330
	BCL6	B-cell CLL/lymphoma 6	604	ENSG00000113916
	BHLHE40	Basic helix-loop-helix family, member e40	8553	ENSG00000134107
	CCSAP	Centriole, cilia and spindle-associated protein	126731	ENSG00000154429
	CEBPA	CCAAT/enhancer binding protein (C/EBP), alpha	1050	ENSG00000245848
	CYP26A1	Cytochrome P450, family 26, subfamily A, polypeptide 1	1592	ENSG00000095596
	DDR1	Discoidin domain receptor tyrosine kinase 1	780	ENSG00000234078
	EBI3	Epstein-Barr virus induced 3	10148	ENSG00000105246
	ENG	Endoglin	2022	ENSG00000106991
	ERO1L	ERO1-like (S. cerevisiae)	30001	ENSG00000197930
	ERRFI1	ERBB receptor feedback inhibitor 1	54206	ENSG00000116285
	EZR	Ezrin	7430	ENSG00000092820
	FKBP2	FK506 binding protein 2	2286	ENSG00000173486
	FLT1	Fms-related tyrosine kinase 1	2321	ENSG00000102755
	FSTL3	Follistatin-like 3 (secreted glycoprotein)	10272	ENSG00000070404
	GAPDH	Glyceraldehyde-3-phosphate dehydrogenase	2597	ENSG00000111640
	GBA	Glucosidase, beta, acid	2629	ENSG00000177628
	GDPD3	Glycerophosphodiester phosphodiesterase domain containing 3	79153	ENSG00000102886
	GPT2	Glutamic pyruvate transaminase (alanine aminotransferase) 2	84706	ENSG00000166123
	GPX3	Glutathione peroxidase 3 (plasma)	2878	ENSG00000211445
	GREM2	Gremlin 2	64388	ENSG00000180875
	HEXB	Hexosaminidase B (beta polypeptide)	3074	ENSG00000049860
	HILPDA	Hypoxia inducible lipid droplet-associated	29923	ENSG00000135245
	HK2	Hexokinase 2	3099	ENSG00000159399
	HTRA1	HtrA serine peptidase 1	5654	ENSG00000166033
	HTRA4	HtrA serine peptidase 4	203100	ENSG00000169495
	IGSF8	Immunoglobulin superfamily, member 8	93185	ENSG00000162729
	INHA	Inhibin, alpha	3623	ENSG00000123999
	INHBA	Inhibin, beta A	3624	ENSG00000122641
	INSIG1	Insulin induced gene 1	3638	ENSG00000186480
	KIF2A	Kinesin heavy chain member 2A	3796	ENSG00000068796
	KIT	V-kit Hardy-Zuckerman 4 feline sarcoma viral oncogene homolog	3815	ENSG00000157404
	KRT19	Keratin 19	3880	ENSG00000171345
	LEP	Leptin	3952	ENSG00000174697
	LHB	Luteinizing hormone beta polypeptide	3972	ENSG00000104826
	LIMD1	LIM domains containing 1	8994	ENSG00000144791
	LRRC1	Leucine rich repeat containing 1	55227	ENSG00000137269
	LYN	V-yes-1 Yamaguchi sarcoma viral related oncogene homolog	4067	ENSG00000254087
	MIF	Macrophage migration inhibitory factor (glycosylation-inhibiting factor)	4282	ENSG00000240972
	NDRG1	N-myc downstream regulated 1	10397	ENSG00000104419
	NEK11	NIMA-related kinase 11	79858	ENSG00000114670
	NRIP1	Nuclear receptor interacting protein 1	8204	ENSG00000180530
	PAPPA2	Pappalysin 2	60676	ENSG00000116183
	PLA2G16	Phospholipase A2, group XVI	11145	ENSG00000176485
	PROCR	Protein C receptor, endothelial	10544	ENSG00000101000
	PVRL4	Poliovirus receptor-related 4	81607	ENSG00000143217
	QPCT	Glutaminyl-peptide cyclotransferase	25797	ENSG00000115828
	RASEF	RAS and EF-hand domain containing	158158	ENSG00000165105
	RDH13	Retinol dehydrogenase 13 (all-trans/9-cis)	112724	ENSG00000262244
	SASH1	SAM and SH3 domain containing 1	23328	ENSG00000111961
	SCARB1	Scavenger receptor class B, member 1	949	ENSG00000073060
	SH3BP5	SH3-domain binding protein 5 (BTK-associated)	9467	ENSG00000131370
	SH3PXD2A	SH3 and PX domains 2A	9644	ENSG00000107957
	SIGLEC6	Sialic acid binding Ig-like lectin 6	946	ENSG00000105492
	SLC26A6	Solute carrier family 26, member 6	65010	ENSG00000225697
	SLC6A8	Solute carrier family 6 (neurotransmitter transporter, creatine), member 8	6535	ENSG00000130821
	SLCO2A1	Solute carrier organic anion transporter family, member 2A1	6578	ENSG00000174640
	SPAG4	Sperm associated antigen 4	6676	ENSG00000061656
	SPTLC3	Serine palmitoyltransferase, long chain base subunit 3	55304	ENSG00000172296
	SYDE1	Synapse defective 1, Rho GTPase, homolog 1 (C. elegans)	85360	ENSG00000105137
	TMEM141	Transmembrane protein 141	85014	ENSG00000244187
	TMEM45A	Transmembrane protein 45A	55076	ENSG00000181458
	TPBG	Trophoblast glycoprotein	7162	ENSG00000146242
	TREM1	Triggering receptor expressed on myeloid cells 1	54210	ENSG00000124731
	VDR	Vitamin D (1,25- dihydroxyvitamin D3) receptor	7421	ENSG00000111424
	*Up-regulated genes in at least four microarray studies out of six
